# Supplementary material for: Development of a carbon nanotube paste electrode modified with zinc phosphate for captopril determination in pharmaceutical and biological samples
Source: Royal Society of Chemistry journal article supplement (doi:10.1039/c3ay42220h), 2014-01-01
Supplement: c3ay42220h.pdf [file c3ay42220h.pdf]

Electronic Supplementary Information for the Article:

**Development of a carbon nanotube paste electrode modified  
with zinc phosphate for captopril determination in  
pharmaceutical and biological samples**

Bruno C. Janegitz<sup>a,b</sup>, Luiz C. Figueiredo-Filho<sup>a</sup>, Fernando Campanhã Vicentini<sup>a</sup>, Maria  
Fernanda M. Ribeiro<sup>a</sup>, Willian T. Suarez<sup>c</sup>, Orlando Fatibello-Filho,<sup>a</sup>  
Jonathan P. Metters<sup>d</sup> and Craig E. Banks<sup>d\*</sup>

<sup>a</sup> *Departamento de Química, Centro de Ciências Exatas e de Tecnologia, 13560-970,  
Universidade Federal de São Carlos, São Carlos - SP, Brazil.*

<sup>b</sup> *Grupo de Nanomedicina e Nanotoxicidade, Instituto de Física de São Carlos,  
Universidade de São Paulo, 13566-590 São Carlos - SP, Brazil.*

<sup>c</sup> *Departamento de Química, Universidade Federal de Viçosa, 36570-000, Viçosa-MG,  
Brazil.*

<sup>d</sup> *Faculty of Science and Engineering, School of Chemistry and the Environment,  
Division of Chemistry and Environmental Science, Manchester Metropolitan  
University, Chester Street, Manchester M15GD, Lancs, UK.*

---

\*To whom relevant correspondence should be addressed:  
email: c.banks@mmu.ac.uk (Craig E. Banks)  
www.craigbanksresearch.com

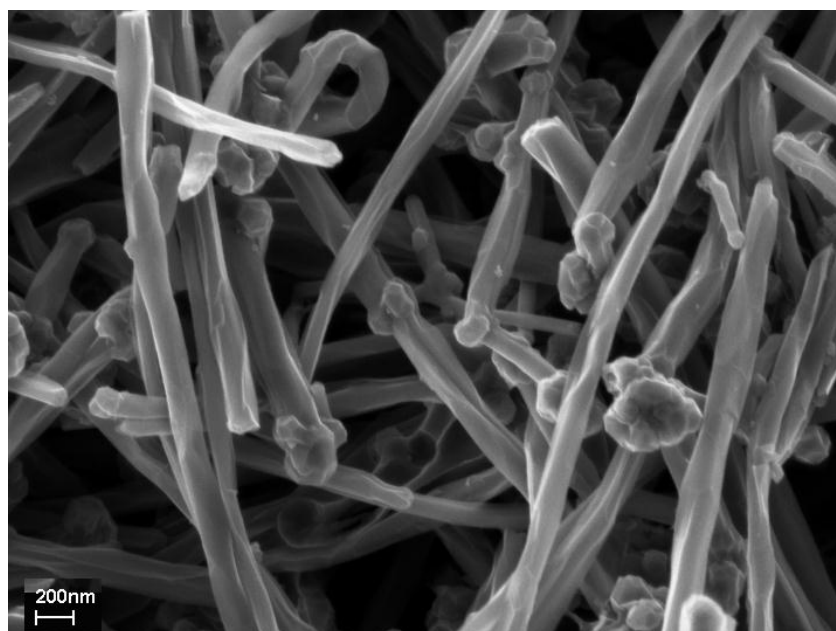

**ESI-FIG 1.** SEM image of the MWCNTs used in this work.
